# Supplementary material for: A Hollow Silicon Nanosphere/Carbon Nanotube Composite as an Anode Material for Lithium-Ion Batteries
Source: MDPI journal article supplement (doi:10.3390/coatings12101515), 2022-10-10
Supplement: s1 [file s1]

# Supplementary Materials: A Hollow Silicon Nanosphere/Carbon Nanotube Composite as an Anode Material for Lithium-Ion Batteries

Hao Tang <sup>†</sup>, Yuanyuan Xu <sup>†</sup>, Li Liu, Decheng Zhao, Zhen Zhang, Yutong Wu, Yi Zhang, Xiang Liu <sup>\*</sup> and Zhoulu Wang <sup>\*</sup>

School of Energy Sciences and Engineering, Nanjing Tech University, Nanjing 211816, China

<sup>\*</sup> Correspondence: iamxliu@njtech.edu.cn (X.L.); zlwang@njtech.edu.cn (Z.W.)

<sup>†</sup> These authors contributed equally to this work.

**Citation:** Tang, H.; Xu, Y.; Liu, L.; Zhao, D.; Zhang, Z.; Wu, Y.; Zhang, Y.; Liu, X.; Wang, Z. A Hollow Silicon Nanosphere/Carbon Nanotube Composite as an Anode Material for Lithium-Ion Batteries. *Coatings* **2022**, *12*, 1515. <https://doi.org/10.3390/coatings12101515>

Academic Editor: Je Moon Yun

Received: 6 September 2022

Accepted: 6 October 2022

Published: 10 October 2022

**Publisher's Note:** MDPI stays neutral with regard to jurisdictional claims in published maps and institutional affiliations.

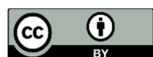

Copyright: © 2022 by the authors. Licensee MDPI, Basel, Switzerland. This article is an open access article distributed under the terms and conditions of the Creative Commons Attribution (CC BY) license (<https://creativecommons.org/licenses/by/4.0/>).

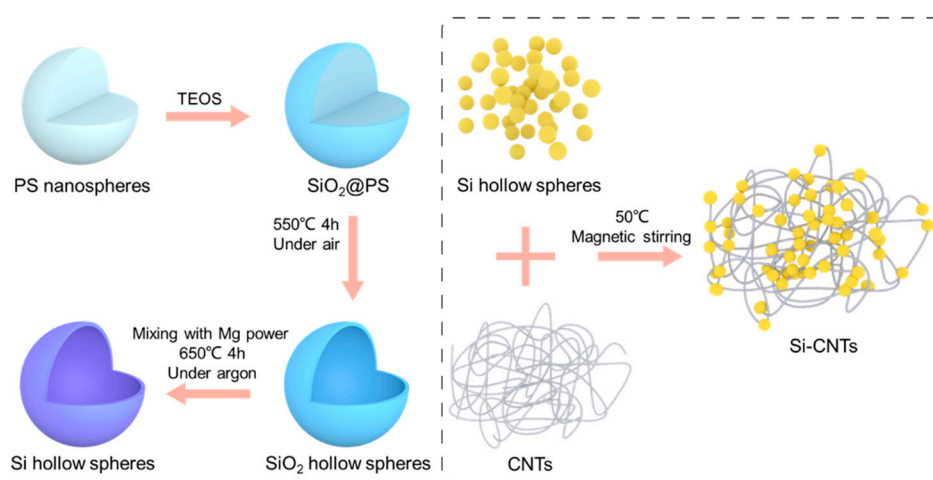

**Figure S1.** Synthesis method of Si-CNTs composite material.

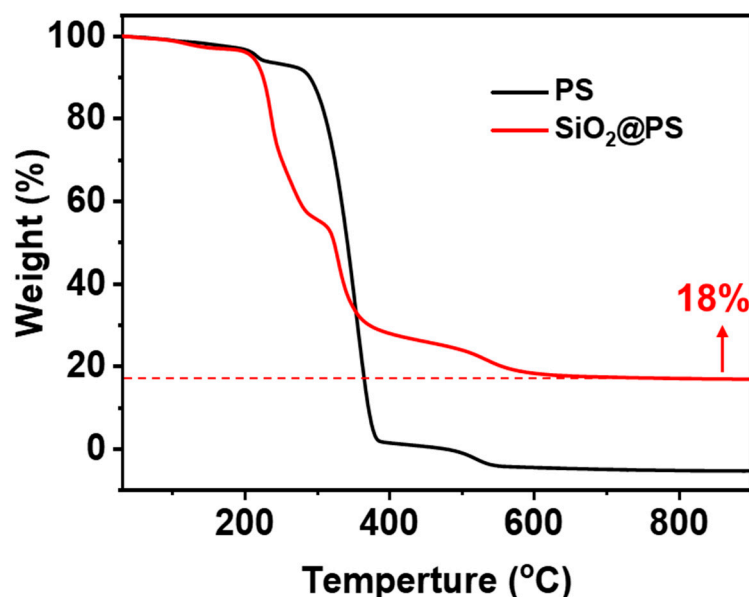

**Figure S2.** Thermogravimetric curves of PS and SiO<sub>2</sub>@PS in an air atmosphere.

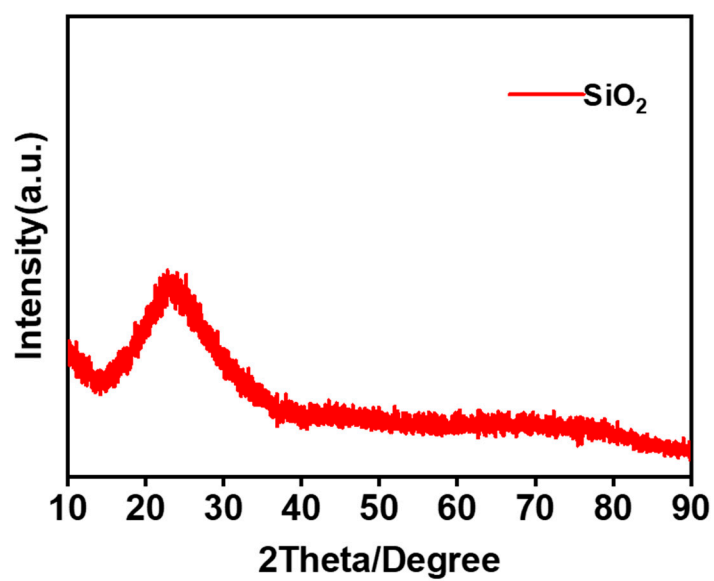

Figure S3. XRD patterns of hollow SiO<sub>2</sub>.

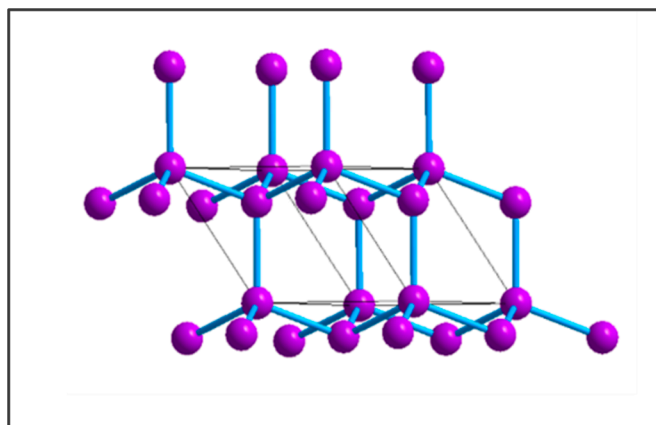

Figure S4. A model of the silicon crystal structure.

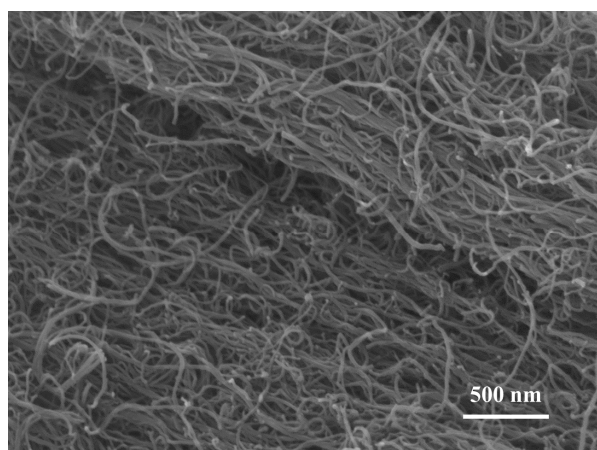

Figure S5. SEM image of CNTs.

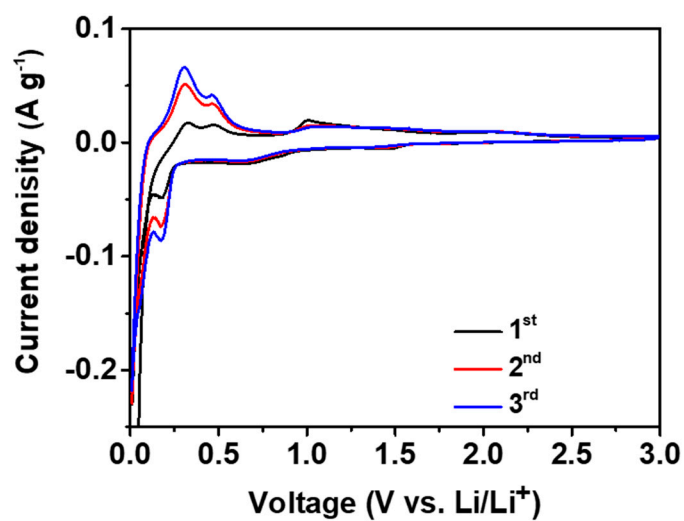

Figure S6. CV of the 50 nm hollow Si for the first three cycles at a scan rate of 0.1 mV/s.

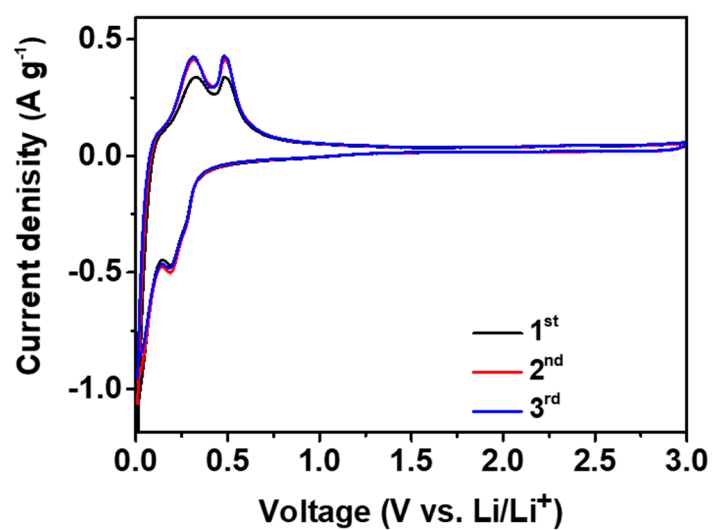

Figure S7. CV curves of the first three cycles of the Si-CNTs at a scan rate of 0.1 mV/s.

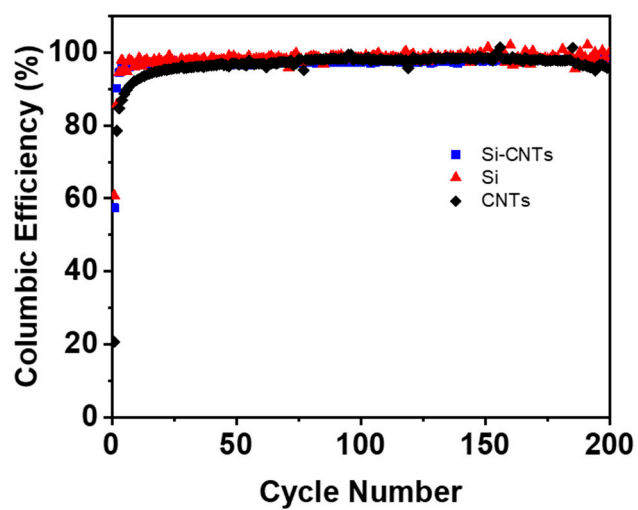

Figure S8. Columbic efficiency of these electrodes at 0.2 A g<sup>-1</sup>.

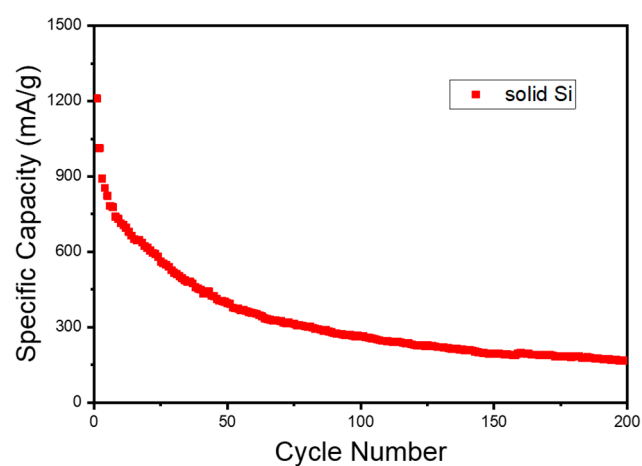

**Figure S9.** Cycling performance for solid nano-silicon spheres.

**Table S1.** Comparison of cycle performance of different silicon-based anodes.

| sample            | Reversible capacity (mAh g <sup>-1</sup> ) | Capacity Retention (%) | Ref.      |
|-------------------|--------------------------------------------|------------------------|-----------|
| Hollow Si/CNTs    | 1526(0.2A/g 200cycles)                     | 77.9                   | This work |
| Si/C              | 584 (0.2 A/g, 200 cycles)                  | 61.5                   | [59]      |
| Si/CNT/C          | 772(0.1C,100cycles)                        | 97.1                   | [60]      |
| Si/nano-Cu/CNTs/C | 984 (0.2 A/g, 180 cycles)                  | 53.6                   | [61]      |
| g-Si/CNTs         | 895 (0.1 A/g, 200 cycles)                  | 84.3                   | [62]      |

## Reference

59. Zhu, G.; Luo, W.; Wang, L.; Jiang, W.; Yang, J. Silicon: toward eco-friendly reduction techniques for lithium-ion battery applications. *J. Mater. Chem. A* **2019**, *7*, 24715–24737.
60. Hu, L.; Luo, B.; Wu, C.; Hu, P.; Wang, L.; Zhang, H. Yolk-shell Si/C composites with multiple Si nanoparticles encapsulated into double carbon shells as lithium-ion battery anodes. *J. Energy Chem.* **2019**, *32*, 124–130.
61. Sakuma, R.; Hashimoto, H.; Kobayashi, G.; Fujii, T.; Nakanishi, M.; Kanno, R.; Takano, M.; Takada, J. High-rate performance of a bacterial iron-oxide electrode material for lithium-ion battery. *Materials Letters* **2015**, *139*, 414–417.
62. Chen, D.; Liao, W.; Yang, Y.; Zhao, J. Polyvinyl alcohol gelation: A structural locking-up agent and carbon source for Si/CNT/C composites as high energy lithium ion battery anode. *J. Power Sources* **2016**, *315*, 236–241.
